# Supplementary material for: Routine data from prevention of mother-to-child transmission (PMTCT) HIV testing not yet ready for HIV surveillance in Mozambique: a retrospective analysis of matched test results
Source: BMC Infect Dis. 2013 Feb 22;13:96. doi: 10.1186/1471-2334-13-96 (PMC3598230; doi:10.1186/1471-2334-13-96)
Supplement: Additional file 2: Table S2 — Site-level difference in HIV prevalence between routine PMTCT and ANC surveillance test results in Mozambique. A table in XLS format showing availability of routine PMTCT test results for specimens with ANC surveillance test results, and differences in test results and HIV prevalence by sentinel site in pregnant women in Mozambique, 2007-2009. [file 1471-2334-13-96-S2.xls]

## Sheet: Supp2
Table S2: Availability of routine PMTCT test results for specimens with ANC surveillance test results, and differences in test results and HIV prevalence by sentinel site in pregnant women in Mozambique, 2007-2009
Sentinel Site	n	Availability of routine PMTCT HIV status for specimens with ANC surveillance results						Comparison between routine PMTCT (R) and ANC surveillance (S) (1)								Difference in prevalence between routine PMTCT HIV status and ANC surveillance
		Without routine PMTCT HIV status			% missing routine PMTCT HIV status	Total with routine PMTCT and ANC surveillance							Prevalence (%)
		Total	Refused PMTCT HIV test	Prior HIV-positive test				R-S+	R+S+	R+S-	R-S-		ANC surveillance	Routine PMTCT HIV status		relative1	absolute2
S01	598	8	0	0	1.34	590		5	63	5	517		11.53	11.53		0	0
S02	598	28	-1	1	4.68	570		10	50	2	508		10.53	9.12		-13.33	-1.404
S03	586	39	-9	9	6.66	547		15	107	16	409		22.3	22.49		0.82	0.183
S04	584	25	0	0	4.28	559		14	152	4	389		29.7	27.91		-6.02	-1.789
S05	594	4	0	0	0.67	590		11	117	7	455		21.69	21.02		-3.13	-0.678
S06	571	17	0	0	2.98	554		18	79	4	453		17.51	14.98		-14.43	-2.527
S07	598	6	0	0	1	592		9	124	15	444		22.47	23.48		4.51	1.014
S08	594	17	-13	13	2.86	577		36	135	11	395		29.64	25.3		-14.62	-4.333
S09	571	5	0	0	0.88	566		7	77	3	479		14.84	14.13		-4.76	-0.707
S10	597	13	0	0	2.18	584		3	154	4	423		26.88	27.05		0.64	0.171
south region	5891	162	-23	23	2.75	5729		128	1058	71	4472		20.7	19.71		-4.81	-0.995
C01	598	25	-10	10	4.18	573		6	165	0	402		29.84	28.8		-3.51	-1.047
C02	587	6	0	0	1.02	581		7	100	3	471		18.42	17.73		-3.74	-0.688
C03	594	36	-6	6	6.06	558		24	133	2	399		28.14	24.19		-14.01	-3.943
C04	593	1	0	0	0.17	592		12	33	2	545		7.6	5.91		-22.22	-1.689
C05	597	4	0	0	0.67	593		3	175	4	411		30.02	30.19		0.56	0.169
C06	598	31	-1	1	5.18	567		8	44	3	512		9.17	8.29		-9.62	-0.882
C07	588	46	-8	8	7.82	542		11	32	4	495		7.93	6.64		-16.28	-1.292
C08	593	8	0	0	1.35	585		9	91	1	484		17.09	15.73		-8	-1.368
C09	584	11	-3	3	1.88	573		7	78	5	483		14.83	14.49		-2.35	-0.349
C10	598	14	0	0	2.34	584		6	79	7	492		14.55	14.73		1.18	0.171
C11	582	6	0	0	1.03	576		24	58	13	481		14.24	12.33		-13.41	-1.91
C12	598	14	-11	11	2.34	584		2	52	1	529		9.25	9.08		-1.85	-0.171
C13	598	6	0	0	1	592		1	91	7	493		15.54	16.55		6.52	1.014
C14	598	9	0	0	1.51	589		5	31	1	552		6.11	5.43		-11.11	-0.679
C15	589	3	0	0	0.51	586		22	116	16	432		23.55	22.53		-4.35	-1.024
center region	8895	220	-39	39	2.47	8675		147	1278	69	7181		16.43	15.53		-5.47	-0.899
N01	597	4	0	0	0.67	593		4	31	1	557		5.9	5.4		-8.57	-0.506
N02	588	4	0	0	0.68	584		0	16	16	552		2.74	5.48		100	2.74
N03	598	26	0	0	4.35	572		8	37	5	522		7.87	7.34		-6.67	-0.524
N04	598	6	0	0	1	592		13	82	1	496		16.05	14.02		-12.63	-2.027
N05	595	51	0	0	8.57	544		3	28	2	511		5.7	5.51		-3.23	-0.184
N06	531	82	-2	2	15.44	449		7	50	8	384		12.69	12.92		1.75	0.223
N07	598	3	0	0	0.5	595		1	32	7	555		5.55	6.55		18.18	1.008
N08	598	25	0	0	4.18	573		17	30	7	519		8.2	6.46		-21.28	-1.745
N09	539	1	0	0	0.19	538		11	35	3	489		8.55	7.06		-17.39	-1.487
N10	596	51	-1	1	8.56	545		6	49	3	487		10.09	9.54		-5.45	-0.55
N11	598	24	0	0	4.01	574		14	32	6	522		8.01	6.62		-17.39	-1.394
north region	6436	277	-3	3	4.3	6159		84	422	59	5594		8.22	7.81		-4.94	-0.406
Total	21222	659	-65	65	3.11	20563		359	2758	199	17247		15.16	14.38		5.1	0.8
Notes:
1. relative difference between routine PMTCT HIV status (R) and ANC surveillance (S) calculated as (R-S)/S. Some values differ from what one would obtain from recalculating using the prevalence estimates in the table due to rounding error. 2. absolute difference between routine PMTCT HIV status (R) and ANC surveillance (S) calculated as (R-S). Some values differ from what one would obtain from re…
